# Supplementary material for: Skin-interfaced microfluidic sweat collection devices for personalized hydration management through thermal feedback
Source: Royal Society of Chemistry journal article supplement (doi:10.1039/d3lc00791j), 2023-12-07
Supplement: d3lc00791j1.pdf [file d3lc00791j1.pdf]

## SUPPORTING INFORMATION

### **Skin-interfaced microfluidic sweat collection devices for personalized hydration management through thermal feedback**

Hanlin Yang<sup>1†</sup>, Hongyan Ding<sup>1†</sup>, Wenkui Wei<sup>1†</sup>, Xiaofeng Li<sup>1</sup>, Xiaojun Duan<sup>2</sup>, Changgen Zhuang<sup>1</sup>, Weiyi Liu<sup>1</sup>, Shangda Cheng<sup>1</sup>, Xiufeng Wang<sup>1\*</sup>

1 School of Materials Science and Engineering, Xiangtan University, Xiangtan, Hunan 411105, China

2 Respiratory medicine department, Hunan Children's Hospital, Changsha, Hunan 410007, China

\* To Whom correspondence should be addressed. E-mail: onexf@xtu.edu.cn (X. Wang).

† These authors contributed equally to this work.

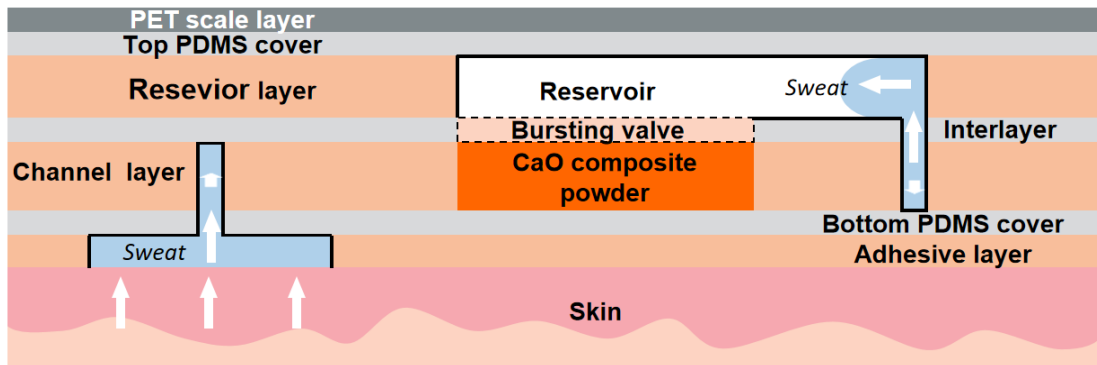

**Figure S1** Schematic diagram of sweat flow path in the device.

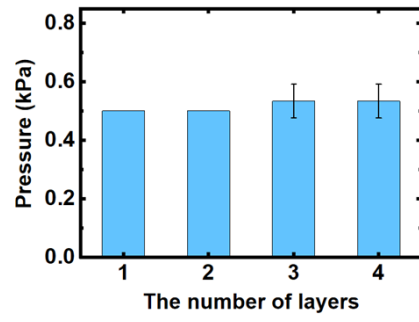

**Figure S2** Pressure required for liquid flow in the microchannel with different number of tape layers.

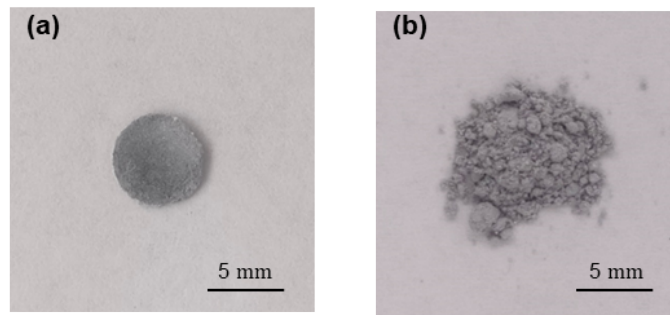

**Figure S3** Different forms of CaO composite with the same weight: (a) Compacting into a tablet-like shape. (b) Without compacting.

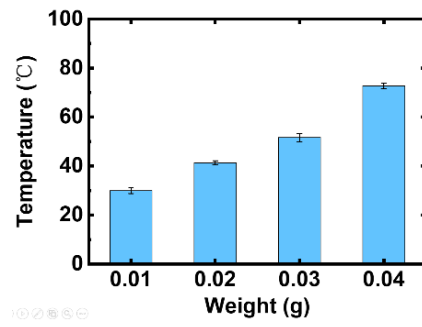

**Figure S4** The highest heating temperature of CaO composite powder with different weights  
(Ambient temperature = 30°C).

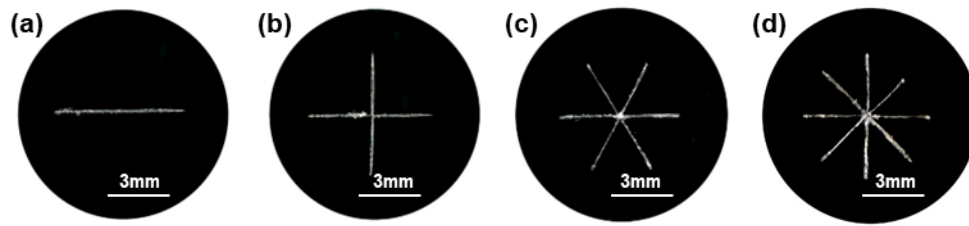

**Figure S5** The bursting valve with different number of petals (NP): (a) NP=2. (b) NP=4.  
(c) NP=6. (d) NP=8.

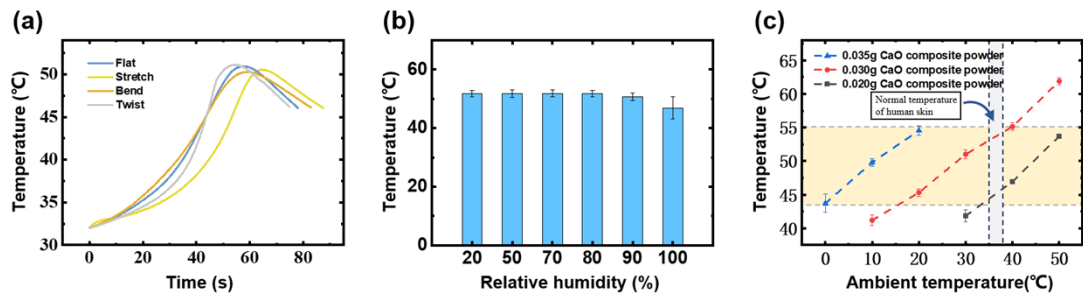

**Figure S6** Performance of devices: (a) under different mechanical deformations, (b) under varying humidity conditions, (c) within a temperature range.

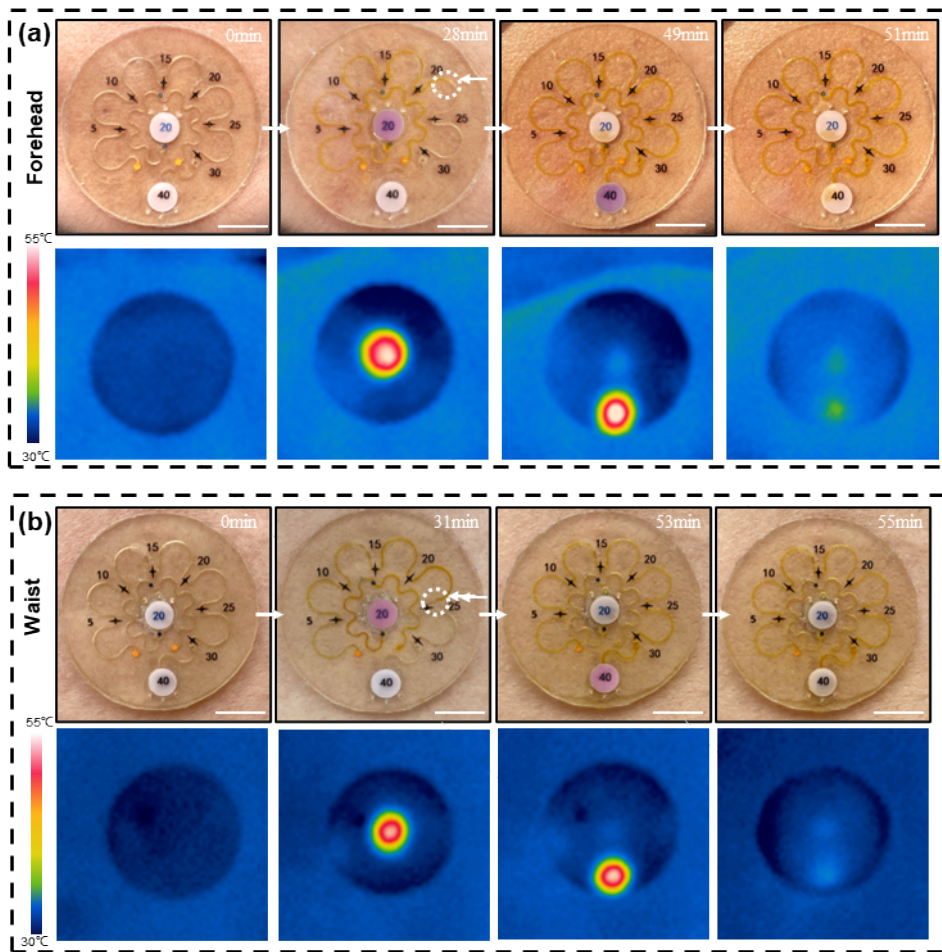

**Figure S7** Infrared imaging of the highest heating temperature and optical image of the sweat collection process from (a) forehead and (b) waist. Scale bar: 1 cm.
